Anesthesiology  
83:127-133, 1995  
© 1995 American Society of Anesthesiologists, Inc.  
Lippincott-Raven Publishers

## Amrinone Is Superior to Epinephrine in Reversing Bupivacaine-induced Cardiovascular Depression in Sevoflurane-anesthetized Dogs

Kazuhiko Saitoh, M.D.,\* Yoshihiro Hirabayashi, M.D.,† Reiju Shimizu, M.D.,‡ Hirokazu Fukuda, M.D.\*

**Background:** Bupivacaine-induced cardiovascular depression is known to be difficult to treat, and the efficacy of epinephrine for treatment of bupivacaine-induced cardiovascular depression is in doubt. We compared the efficacy of amrinone with that of epinephrine for the treatment of bupivacaine-induced cardiovascular depression in anesthetized dogs.

**Methods:** In dogs receiving 1.5–2% sevoflurane anesthesia, 0.5% bupivacaine was infused at a rate of  $0.5 \text{ mg} \cdot \text{kg}^{-1} \cdot \text{min}^{-1}$  intravenously until mean arterial blood pressure decreased to 40 mmHg or less. In the amrinone group ( $n = 9$ ), amrinone ( $4 \text{ mg} \cdot \text{kg}^{-1}$ , intravenously) was given immediately after cardiovascular depression, followed by intravenous infusion at a rate of  $0.1 \text{ mg} \cdot \text{kg}^{-1} \cdot \text{min}^{-1}$ . In the epinephrine group ( $n = 9$ ), epinephrine ( $0.01 \text{ mg} \cdot \text{kg}^{-1}$ , intravenously) was given as a bolus, and the same dose was given again as required.

**Results:** All nine dogs that received amrinone survived. Of the nine dogs that received epinephrine, five survived; fatal cardiovascular depression developed in the four remaining animals ( $P < 0.05$ ). Only one animal in the amrinone group showed tachyarrhythmia with wide QRS complexes during resuscitation, whereas all nine animals in the epinephrine group showed tachyarrhythmia with wide QRS complexes during resuscitation.

**Conclusions:** Amrinone is superior to epinephrine for the treatment of bupivacaine-induced cardiovascular depression in sevoflurane-anesthetized dogs. (Key words: Anesthetics, local: bupivacaine. Anesthetics, volatile: sevoflurane. Heart: cardiovascular depression. Pharmacology: amrinone. Sympathetic nervous system, catecholamines: epinephrine.)

\* Clinical Assistant.

† Lecturer.

‡ Professor and Chair.

Received from the Department of Anesthesiology, Jichi Medical School, Tochigi, Japan. Submitted for publication July 18, 1994. Accepted for publication March 20, 1995.

Address reprint requests to Dr. Saitoh: Department of Anesthesiology, Jichi Medical School, 3311-1 Minamikawachi-machi, Kawachigun, Tochigi, 329-04 Japan.

§ *Guide for Laboratory Animals*. Tochigi, Japan, Jichi Medical School, 1993.

|| American Physiological Society: *Guiding Principles in the Care and Use of Animals*.

ACCIDENTAL intravascular injection of bupivacaine may produce profound cardiovascular depression, from which successful resuscitation may be difficult.<sup>1</sup> In clinical settings<sup>2,3</sup> and laboratory investigations,<sup>4–7</sup> epinephrine has commonly been used to treat bupivacaine-induced cardiovascular depression. However, the use of epinephrine to treat bupivacaine-induced cardiovascular depression remains controversial.<sup>7,8</sup>

Amrinone, a new inotropic agent, increases intracellular cyclic adenosine monophosphate and  $\text{Ca}^{2+}$  through the inhibition of phosphodiesterase fraction III. This drug has been reported to be effective for profound cardiovascular depression in situations in which sympathomimetic agents are ineffective.<sup>9</sup> It has been found that amrinone can reverse bupivacaine cardiotoxicity in pigs.<sup>10</sup> The current study was performed to compare the efficacy of amrinone with that of epinephrine for the treatment of bupivacaine-induced cardiovascular depression in sevoflurane-anesthetized dogs.

### Materials and Methods

#### Animal Preparation

The study was performed in accordance with *Guide for Laboratory Animals* of our institution. § All procedures conformed to the *Guiding Principles in the Care and Use of Animals* || of the American Physiological Society.

Eighteen mongrel dogs of either sex (body weight 8–16 kg) were studied. Anesthesia was induced with ketamine ( $2 \text{ mg} \cdot \text{kg}^{-1}$ , intravenously) and maintained with 2–3% sevoflurane in  $\text{O}_2$  during surgical preparation. The trachea was intubated after administration of succinylcholine ( $1 \text{ mg} \cdot \text{kg}^{-1}$ , intravenously), and the lungs were ventilated with a volume-controlled respirator (R-60, Aika, Tokyo, Japan). Lactated Ringer's solution was infused at a rate

of  $5 \text{ ml} \cdot \text{kg}^{-1} \cdot \text{h}^{-1}$  throughout the study. Heart rate was continuously monitored from lead II of the electrocardiograph. A high-fidelity transducer-tipped catheter (7-French, 45326, Toyoda Instruments, Tokyo, Japan) was placed in the descending aorta *via* the left femoral artery to monitor systolic and diastolic arterial blood pressures and mean arterial blood pressure (MAP). A polyethylene catheter placed in the left axillary artery was used to obtain blood samples. A second polyethylene catheter was inserted into the superior vena cava *via* the left axillary vein to measure central venous pressure. A balloon-tipped catheter (7-French, Swan-Ganz, American Edwards Laboratories, Irvine, CA) was introduced into the pulmonary artery *via* the right external jugular vein, and cardiac output was measured by the thermodilution method. A high-fidelity transducer-tipped catheter (Mikro-Tip catheter pressure transducer, 8-French, PC380, Millar Instruments, Houston, TX) was placed in the left ventricular cavity *via* the right internal carotid artery to measure left ventricular pressure. The rate of increase in left ventricular pressure (left ventricular  $\text{dP/dt}$ ) was obtained with an analogue-differentiating circuit incorporating an analogue-digital converter (Contractility Unit 1323, NEC San-ei Instruments, Tokyo, Japan). Hemodynamic variables were continuously monitored with a polygraph (Recti-Hortiz-8K23, NEC San-ei Instruments). Left ventricular pressure, left ventricular  $\text{dP/dt}$ , left ventricular end-diastolic pressure, and electrocardiographic signals were also fed to another recorder (Visigraph 5L37, NEC San-ei Instruments). These four parameters were recorded on a multichannel photographic oscillograph at a paper speed of  $50 \text{ cm} \cdot \text{s}^{-1}$  to determine the time constant of isovolemic pressure decrease after the attainment of maximum negative left ventricular  $\text{dP/dt}$ .<sup>11</sup>

After surgical preparation, the dogs were allowed to breathe 1.5–2% sevoflurane in  $\text{O}_2$  spontaneously to stabilize hemodynamics for 30 min before the start of experiments. If movement was observed with use of 1.5% sevoflurane anesthesia, the concentration of sevoflurane was increased.

#### Experimental Design

The dogs were randomly assigned to receive either amrinone or epinephrine. After baseline recordings

# Unpublished data.

were obtained, 0.5% bupivacaine (Marcain, Fujisawa Pharmaceuticals, Tokyo, Japan) was administered at a rate of  $0.5 \text{ mg} \cdot \text{kg}^{-1} \cdot \text{min}^{-1}$  through the peripheral venous catheter. Bupivacaine was continuously infused and sevoflurane was inhaled until MAP decreased to 40 mmHg or less, which was defined as the point of cardiovascular depression in this study. After respiratory arrest, which occurred about 10 min before cardiovascular depression, the lungs were mechanically ventilated. When MAP had decreased to 40 mmHg or less, the amrinone group received amrinone (Caltonic, Yamanouchi Pharmaceuticals, Tokyo, Japan) as a bolus of  $4 \text{ mg} \cdot \text{kg}^{-1}$  followed by infusion at a rate of  $0.1 \text{ mg} \cdot \text{kg}^{-1} \cdot \text{min}^{-1}$  through the central venous catheter.

This dose used and administrative method were based on the report by Lindgren *et al.*<sup>10</sup> and our preliminary studies.<sup>#</sup> The nine animals in the other group received epinephrine at a dose of  $0.01 \text{ mg} \cdot \text{kg}^{-1}$ , intravenously. The same dose of epinephrine was administered repeatedly if MAP decreased to less than 40 mmHg. The dose of epinephrine and the administrative method were based on a previous report<sup>4</sup> and our preliminary studies and also were based on the method used in clinical practice. External cardiac compression was applied while MAP remained less than 40 mmHg to circulate administered drugs. The animals were considered to have been successfully resuscitated if MAP was maintained for more than 5 min at 60 mmHg or greater without continuous amrinone administration or additional epinephrine and if the electrocardiogram showed normal sinus rhythm and a QRS complex pattern similar to that before bupivacaine administration.

#### Hemodynamic Measurement

MAP, heart rate, left ventricular pressure, maximum left ventricular  $\text{dP/dt}$ , central venous pressure, and left ventricular end-diastolic pressure were continuously monitored. Cardiac output was measured by using ice-cold 5% dextrose with monitoring of the thermodilution curve, and readings were taken when a smooth thermodilution curve had been obtained twice at a 5-min interval. Values at baseline, values immediately before cardiovascular depression (before resuscitation), and values after successful resuscitation (after resuscitation) were used for analysis.

#### Blood Samples for Laboratory Analysis

Arterial blood samples for measurement of plasma bupivacaine concentration; for measurement of serum  $\text{K}^+$ ,  $\text{Na}^+$ , and  $\text{Ca}^{2+}$  concentrations; and for blood gas

analysis were obtained at baseline and after resuscitation. Samples were assayed for each experiment. An aliquot of a sample was centrifuged, and plasma was stored at  $-20^\circ\text{C}$ . Samples were assayed by high-performance liquid chromatography to measure plasma concentrations.

#### Statistical Analysis

The chi-squared test was used to compare between groups concerning data on sinus rhythm. Student's unpaired *t* test was used to compare differences between groups for heart rate and electrolyte data. For paired *t* tests for comparison between groups before resuscitation and for comparison between groups after resuscitation. Statistical significance was  $< 0.05$ .

#### Results

All anesthetized dogs had normal sinus rhythm before the administration of bupivacaine. After bupivacaine infusion ( $0.5 \text{ mg} \cdot \text{kg}^{-1} \cdot \text{min}^{-1}$ ), cardiovascular depression in every animal was observed. Differences in weight, sevoflurane concentration, and time to cardiovascular depression, or time to resuscitation, between groups (table 1).

#### Survival and Dysrhythmias

All nine dogs receiving amrinone survived. These animals required closed-circuit ventilation during administration of amrinone. Five dogs receiving epinephrine, five survived, and four died. In the remaining four dogs, resuscitation was achieved. In the remaining four dogs, depression developed despite  $0.05$ – $0.07 \text{ mg} \cdot \text{kg}^{-1}$  epinephrine. There were no significant differences in survival rate between the groups in survival rate ( $P = 0.02$ ).

Cardiac dysrhythmias were observed in all dogs receiving bupivacaine infusion in the amrinone group and in two dogs in the epinephrine group. The difference between the two groups in the occurrence of dysrhythmias during bupivacaine infusion was statistically significant. Only one dog in the amrinone group showed serious cardiac dysrhythmias, including tachyarrhythmia with wide multifocal premature ventricular



## AMRINONE AND BUPIVACAINE TOXICITY

analysis were obtained at baseline and before and after resuscitation. Samples were assayed immediately after each experiment. An aliquot of arterial blood was centrifuged, and plasma was stored at  $-20^{\circ}\text{C}$ . Plasma samples were assayed by high-performance liquid chromatography to measure plasma bupivacaine concentrations.

### Statistical Analysis

The chi-squared test was used to identify differences between groups concerning data of survival and dysrhythmia. Student's unpaired *t* test was used to identify differences between groups. Hemodynamic, blood gas, and electrolyte data were tested with paired and unpaired *t* tests for comparison between baseline and before resuscitation and for comparison before and after resuscitation. Statistical significance was defined as  $p < 0.05$ .

## Results

All anesthetized dogs had normal sinus rhythm before the administration of bupivacaine. Intravenous bupivacaine infusion ( $0.5 \text{ mg} \cdot \text{kg}^{-1} \cdot \text{min}^{-1}$ ) caused cardiovascular depression in every animal. There were no differences in weight, sevoflurane concentration, time to cardiovascular depression, or total bupivacaine dose between groups (table 1).

### Survival and Dysrhythmias

All nine dogs receiving amrinone survived. None of these animals required closed-chest cardiac massage during administration of amrinone. Of the nine dogs receiving epinephrine, five survived. These five dogs received  $0.01$  or  $0.02 \text{ mg} \cdot \text{kg}^{-1}$  epinephrine during resuscitation. In the remaining four, fatal cardiovascular depression developed despite the administration of  $0.05$ – $0.07 \text{ mg} \cdot \text{kg}^{-1}$  epinephrine. The difference between the groups in survival rate was statistically significant ( $P = 0.02$ ).

Cardiac dysrhythmias were observed during intravenous bupivacaine infusion in three dogs in the amrinone group and in two dogs in the epinephrine group. The difference between the two groups in the incidence of dysrhythmias during bupivacaine infusion was not statistically significant. Only one animal in the amrinone group showed serious cardiac dysrhythmia, including tachyarrhythmia with wide QRS complexes and multifocal premature ventricular contractions during

Table 1. Baseline Data

|                                                             | Amrinone        | Epinephrine     |
|-------------------------------------------------------------|-----------------|-----------------|
| Weight (kg)                                                 | $10.7 \pm 2.6$  | $12.1 \pm 2.4$  |
| Sevoflurane concentration (%)                               | $1.63 \pm 0.17$ | $1.63 \pm 0.22$ |
| Time to circulatory collapse (min)                          | $30.0 \pm 7.65$ | $30.0 \pm 7.31$ |
| Total bupivacaine dose ( $\text{mg} \cdot \text{kg}^{-1}$ ) | $15.0 \pm 3.82$ | $15.0 \pm 3.66$ |

Values are mean  $\pm$  SD.

resuscitation with amrinone, whereas serious cardiac dysrhythmias developed in every animal in the epinephrine group (table 2 and fig. 1). The difference in the incidence of dysrhythmia during resuscitation between groups was statistically significant ( $P = 0.0001$ ).

### Hemodynamic Parameters

In both groups, hemodynamic parameters were measured until the outcome of resuscitation was judged.

Intravenous infusion of bupivacaine significantly decreased MAP, heart rate, cardiac output, stroke volume, and maximum left ventricular dP/dt and significantly increased central venous pressure, left ventricular end-diastolic pressure, and the time constant of isovolemic pressure decrease after attainment of maximum negative left ventricular dP/dt. No significant differences between the two groups were found at baseline or before resuscitation. MAP, heart rate, cardiac output, and stroke volume after resuscitation were comparable between the two groups. Left ventricular end-diastolic pressure and central venous pressure remained significantly greater in the epinephrine group than in the amrinone group after resuscitation. Systemic vascular resistance significantly decreased after the administration of amrinone (table 3).

### Plasma Bupivacaine Concentrations and Other Laboratory Findings

Intravenous infusion of bupivacaine resulted in similar plasma bupivacaine concentrations in the two groups (table 4). There were no statistical differences in serum  $\text{K}^+$ ,  $\text{Na}^+$ , and  $\text{Ca}^{2+}$  concentrations between the two groups. Arterial  $\text{O}_2$  tension,  $\text{CO}_2$  tension, and pH also were comparable between the two groups at all measurement points (table 5).

## Discussion

The results of this study indicate that the efficacy of amrinone is greater than that of epinephrine for the

Table 2. Types of Dysrhythmias

| Group       | Animal No. | Survival | Dysrhythmia          |                      |
|-------------|------------|----------|----------------------|----------------------|
|             |            |          | Before Resuscitation | During Resuscitation |
| Amrinone    | 1          | Survived | (-)                  | Sinus dysrhythmia    |
|             | 2          | Survived | (-)                  | (-)                  |
|             | 3          | Survived | (-)                  | (-)                  |
|             | 4          | Survived | Sinus dysrhythmia    | (-)                  |
|             | 5          | Survived | Nodal rhythm         | Nodal rhythm         |
|             | 6          | Survived | (-)                  | (-)                  |
|             | 7          | Survived | TWC                  | TWC                  |
|             | 8          | Survived | (-)                  | (-)                  |
|             | 9          | Survived | (-)                  | (-)                  |
| Epinephrine | 1          | Survived | (-)                  | TWC and mPVCs        |
|             | 2          | Died     | (-)                  | TWC and mPVCs        |
|             | 3          | Survived | (-)                  | TWC and mPVCs        |
|             | 4          | Survived | (-)                  | TWC and mPVCs        |
|             | 5          | Died     | (-)                  | TWC                  |
|             | 6          | Died     | Sinus dysrhythmia    | TWC and mPVCs        |
|             | 7          | Died     | (-)                  | TWC                  |
|             | 8          | Survived | (-)                  | TWC and mPVCs        |
|             | 9          | Survived | (-)                  | TWC and mPVCs        |

TWC = tachydysrhythmia with wide QRS complex; mPVCs = multifocal premature ventricular contractions.

treatment of bupivacaine-induced cardiovascular depression in sevoflurane-anesthetized dogs. First, in contrast to the high mortality rate in the epinephrine

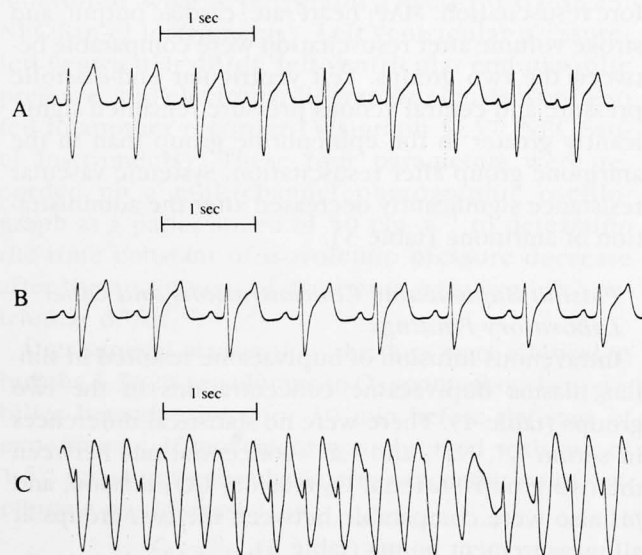

Fig. 1. (A) Electrocardiogram (ECG) during cardiovascular depression, before treatment. (B) ECG after administration of amrinone. (C) ECG after administration of epinephrine. All animals receiving epinephrine showed this ECG pattern, and in the five surviving animals in this group the ECG spontaneously returned to sinus rhythm.

group, all the animals receiving amrinone survived ( $P = 0.02$ ). Second, serious ventricular dysrhythmias were rare in animals receiving amrinone compared with those receiving epinephrine ( $P = 0.0001$ ).

There are several limitations in study design that require discussion. First, continuous bupivacaine infusion model in this study does not completely mimic the situation of accidental intravascular injection of bupivacaine in clinical practice. In clinical practice, the cardiovascular depression occurs commonly with accidental bolus administration of bupivacaine. Accidental intravascular continuous infusion of bupivacaine, however, can occur through intravascular migration of the epidural catheter during anesthesia and pain management. During a relatively long and slow infusion of bupivacaine, the animals may benefit from compensatory mechanisms, including increased sympathetic nerve activity, increased circulating catecholamines and redistribution of blood from the very large spleen of the dogs. Second, cardiac arrest, including ventricular fibrillation, is commonly observed as part of bupivacaine-induced cardiovascular collapse in clinical practice.<sup>1,3</sup> In this study, cardiovascular depression but not cardiac arrest was induced. Third, because the life-threatening dysrhythmias may be mediated neurologically,<sup>12</sup> general anesthesia may modify the process by which cardiac arrest is induced. In ad-

Table 3. Hemodynamic Parameters

|                                    | Baseline<br>(n = 9) |
|------------------------------------|---------------------|
| MAP (mmHg)                         | 110 ± 6             |
| HR (beats · min <sup>-1</sup> )    | 117 ± 5             |
| CO (L · min <sup>-1</sup> )        | 2,463 ± 194         |
| SV (ml · beat <sup>-1</sup> )      | 27 ± 2              |
| TP (ms)                            | 2.1 ± 0.2           |
| CO (L · min <sup>-1</sup> )        | 18 ± 2              |
| SV (ml · beat <sup>-1</sup> )      | 4 ± 0.4             |
| LVEDP (mmHg)                       | 1 ± 0.6             |
| CVP (mmHg)                         | 4,354 ± 335         |
| SVR (dyne · s · cm <sup>-5</sup> ) |                     |

Values are mean ± SEM.

Before = point immediately before cardiovascular depression.

HR = maximum rate of rise of left ventricular pressure.

CO = cardiac output; LVEDP = left ventricular end-diastolic pressure.

\*  $P < 0.05$  versus baseline.

†  $P < 0.05$  versus before cardiovascular depression.

‡  $P < 0.05$  versus epinephrine group.

dition, if amrinone or epinephrine were administered after cardiac arrest, the results would be different from the results presented here. After cardiac arrest, the decrease in peripheral resistance produced by amrinone and chest compressions ineffective to increase MAP; during chest compressions, the effects of epinephrine may have provided a better coronary and brain perfusion pressure. These results may have provided a better method of administration of amrinone for resuscitation were different and the results in this study.

Bupivacaine-induced hemodynamic depression was caused mainly by depressions of myocardial contractility resulting from inhibition of myocardial metabolism, alterations in  $Ca^{2+}$  release from the sarcoplasmic reticulum, and a decrease in current.<sup>13-15</sup> Amrinone, as an inhibitor of phosphodiesterase fraction III, increases intracellular adenosine monophosphate, which enters the myocardial cells.<sup>9,16</sup> In the present study, the significantly greater survival rate of amrinone-treated dogs may be attributable to improved myocardial contractility resulting from increased intracellular cAMP. Other phosphodiesterase inhibitors, such as milrinone, may be effective in reversing the depression induced by bupivacaine.

## AMRINONE AND BUPIVACAINE TOXICITY

Table 3. Hemodynamic Parameters

|                                                | Amrinone Group      |                   |                  | Epinephrine Group   |                   |                  |
|------------------------------------------------|---------------------|-------------------|------------------|---------------------|-------------------|------------------|
|                                                | Baseline<br>(n = 9) | Before<br>(n = 9) | After<br>(n = 9) | Baseline<br>(n = 9) | Before<br>(n = 9) | After<br>(n = 5) |
| MAP (mmHg)                                     | 110 ± 6             | 46 ± 4*           | 73 ± 4†          | 107 ± 5             | 45 ± 3*           | 70 ± 3†          |
| HR (beats · min <sup>-1</sup> )                | 117 ± 5             | 86 ± 4*           | 95 ± 6†          | 124 ± 6             | 91 ± 8*           | 93 ± 5           |
| dP/dt <sub>max</sub> (mmHg · s <sup>-1</sup> ) | 2,463 ± 194         | 544 ± 98*         | 1,788 ± 166†‡    | 2,527 ± 228         | 538 ± 34*         | 1,118 ± 116†     |
| T (ms)                                         | 27 ± 2              | 57 ± 6*           | 25 ± 2†‡         | 23 ± 2              | 51 ± 3*           | 36 ± 6†          |
| CO (L · min <sup>-1</sup> )                    | 2.1 ± 0.2           | 0.6 ± 0.1*        | 1.9 ± 0.4†       | 2.9 ± 0.5           | 0.7 ± 0.1*        | 1.1 ± 0.2†       |
| SV (ml · beat <sup>-1</sup> )                  | 18 ± 2              | 7 ± 1*            | 19 ± 4†          | 23 ± 3              | 8 ± 1*            | 13 ± 3†          |
| LVEDP (mmHg)                                   | 4 ± 0.4             | 9 ± 1.3*          | 5 ± 1.0†‡        | 5 ± 0.4             | 9 ± 1.1*          | 10 ± 1.3         |
| CVP (mmHg)                                     | 1 ± 0.6             | 7 ± 0.8*          | 2 ± 0.7†‡        | 2 ± 0.7             | 7 ± 0.8*          | 6 ± 0.7          |
| SVR (dyne · s · cm <sup>-5</sup> )             | 4,354 ± 335         | 5,729 ± 586*      | 3,096 ± 399†‡    | 3,471 ± 519         | 4,634 ± 498*      | 4,931 ± 760      |

Values are mean ± SEM.

Before = point immediately before cardiovascular collapse; After = point after successful resuscitation; MAP = mean arterial pressure; HR = heart rate; dP/dt<sub>max</sub> = maximum rate of rise of left ventricular pressure; T = time constant of isovolumic pressure fall after maximum negative dP/dt; CO = cardiac output; SV = stroke volume; LVEDP = left ventricular end-diastolic pressure; CVP = central venous pressure; SVR = systemic vascular resistance.

\*  $P < 0.05$  versus baseline.

†  $P < 0.05$  versus before cardiovascular collapse.

‡  $P < 0.05$  versus epinephrine group.

dition, if amrinone or epinephrine had been administered after cardiac arrest, the results may have been different from the results presented. During resuscitation after cardiac arrest, the decrease in systemic vascular resistance produced by amrinone may have made chest compressions ineffective to generate a reasonable MAP; during chest compressions the  $\alpha$ -adrenergic effects of epinephrine may have produced greater coronary and brain perfusion pressures, which consequently may have provided a better outcome. Finally, methods of administration of amrinone or epinephrine for resuscitation were different and may have influenced the results in this study.

Bupivacaine-induced hemodynamic disturbances are caused mainly by depression of myocardial contractility resulting from inhibition of myocardial energetic metabolism, alterations in  $\text{Ca}^{2+}$  release from cardiac sarcoplasmic reticulum, and a decrease in the slow inward current.<sup>13-15</sup> Amrinone, as an inhibitor of phosphodiesterase fraction III, increases intracellular cyclic adenosine monophosphate, which facilitates  $\text{Ca}^{2+}$  entry into the myocardial cells.<sup>9,16</sup> In the current study, the significantly greater survival rate in the amrinone-treated dogs compared with the epinephrine-treated dogs may be attributable to improved myocardial contractility resulting from increased intracellular  $\text{Ca}^{2+}$ . Other phosphodiesterase inhibitors, in the view of their mechanisms, may be effective for cardiovascular depression induced by bupivacaine. Therefore, further

studies involving the use of other phosphodiesterase inhibitors should be performed.

Although epinephrine is reported to antagonize the cardiovascular depression induced by bupivacaine,<sup>2,5</sup> our results demonstrated the limitation of epinephrine for treatment of bupivacaine-induced cardiovascular depression. Butterworth *et al.*<sup>17</sup> showed that bupivacaine inhibits the production of epinephrine-induced cyclic adenosine monophosphate *in vitro*. This inhibition may have contributed to the limitation of epinephrine for bupivacaine-induced cardiovascular depression in the current study. Because we did not measure the serum concentration of epinephrine, it is unclear if the serum concentration of epinephrine in the current study was comparable to that in the study by Butterworth *et al.*<sup>17</sup>

All of the dogs receiving epinephrine had severe tachyarrhythmias. In contrast, the dogs receiving amrinone did not have any dysrhythmias except for one

Table 4. Plasma Bupivacaine Concentrations before Resuscitation

| Group       | Plasma Bupivacaine<br>(mg · ml <sup>-1</sup> ) |
|-------------|------------------------------------------------|
| Amrinone    | 13.6 ± 2.34                                    |
| Epinephrine | 11.6 ± 2.67                                    |

Values are mean ± SD.



Table 5. Blood Gas and Serum Electrolyte Data

|                                           | Amrinone Group |               |              | Epinephrine Group |               |              |
|-------------------------------------------|----------------|---------------|--------------|-------------------|---------------|--------------|
|                                           | Baseline       | Before        | After        | Baseline          | Before        | After        |
| pH                                        | 7.341 ± 0.02   | 7.282 ± 0.01* | 7.248 ± 0.02 | 7.347 ± 0.02      | 7.281 ± 0.03* | 7.231 ± 0.04 |
| Pa <sub>CO<sub>2</sub></sub> (mmHg)       | 37.6 ± 1.2     | 41.3 ± 2.0    | 41.8 ± 2.5   | 33.8 ± 1.6        | 39.8 ± 3.5    | 36.8 ± 2.9   |
| Pa <sub>O<sub>2</sub></sub> (mmHg)        | 521 ± 18       | 496 ± 19      | 491 ± 20     | 507 ± 19          | 500 ± 21      | 487 ± 22     |
| Na <sup>+</sup> (mEq · L <sup>-1</sup> )  | 143 ± 3.1      | 135 ± 1.5*    | 138 ± 1.0    | 140 ± 1.3         | 137 ± 1.4*    | 138 ± 3.0    |
| K <sup>+</sup> (mEq · L <sup>-1</sup> )   | 3.1 ± 0.2      | 2.7 ± 0.1*    | 2.7 ± 0.1    | 3.1 ± 0.1         | 3.1 ± 0.5     | 2.8 ± 0.3    |
| Ca <sup>2+</sup> (mEq · L <sup>-1</sup> ) | 1.16 ± 0.02    | 1.11 ± 0.04   | 1.17 ± 0.05  | 1.15 ± 0.06       | 1.13 ± 0.04   | 1.11 ± 0.05  |

Values are mean ± SEM.

Before = point immediately before cardiovascular collapse; After = point after successful resuscitation.

\*  $P < 0.05$  versus baseline.

animal that showed tachyarrhythmia before cardiovascular depression. Lindgren *et al.*<sup>10</sup> reported the effect of amrinone on recovery from bupivacaine-induced cardiovascular depression in pigs. In contrast to the current study, they noted serious dysrhythmias during administration of amrinone. The reason our results disagree with theirs is not clear but may be related to the difference in study design, including differences in basal anesthetic techniques, the doses of bupivacaine and amrinone, the ventilation mode, and the species. Whether antidysrhythmic drugs improved the survival rate in our epinephrine group remains doubtful, because almost all antidysrhythmic agents produce cardiovascular depression and ion-channel blockade. In animal studies, the treatment of bupivacaine-induced cardiovascular depression has been attempted with bretylium, lidocaine, and amiodarone, with varying results.<sup>5,7,18</sup>

Various drugs can modify the hemodynamic response to bupivacaine-induced cardiotoxicity to a certain degree. In this study, a low concentration of sevoflurane was given to the dogs to prevent movement. Sevoflurane, which is a cardiodepressant agent,<sup>19</sup> may have affected our results to some extent. In fact, the peak plasma bupivacaine concentration required to induce cardiovascular depression was less in our dogs than in those anesthetized with opioids.<sup>20,21</sup> The ketamine used for induction of anesthesia is also thought to have had little effect on our results because the experiment was started at least 2 h after ketamine administration. There were no differences between the groups in the concentration of sevoflurane or the dose of ketamine used. Acidosis, hypoxia,<sup>22</sup> and hyperkalemia<sup>20</sup> may also modify the hemodynamic response to bupivacaine-induced cardiotoxicity. In this study, dogs in both groups were

maintained in conditions of normocapnia, hyperoxia, and normokalemia to avoid these effects.

In conclusion, in sevoflurane-anesthetized dogs, amrinone appears to be superior to epinephrine for reversal of severe cardiovascular depression induced by bupivacaine. Therefore, amrinone and other phosphodiesterase inhibitors merit further study as an initial treatment for severe cardiovascular depression after bupivacaine. However, the place of amrinone or other phosphodiesterase inhibitors in the management of cardiac arrest or life-threatening dysrhythmias caused by local anesthetic toxicity was not defined by this study.

The authors are deeply indebted to N. Yoshida (NEC San-ei, Tokyo, Japan) for his excellent technical assistance.

## References

1. Albright GA: Cardiac arrest following regional anesthesia with etidocaine or bupivacaine. *ANESTHESIOLOGY* 51:285-287, 1979
2. Moore DC, Scurlock JE: Possible role of epinephrine in prevention or correction of myocardial depression associated with bupivacaine. *Anesth Analg* 62:450-453, 1983
3. Long WB, Rosenblum S, Grady IP: Successful resuscitation of bupivacaine-induced cardiac arrest using cardiopulmonary bypass. *Anesth Analg* 69:403-406, 1989
4. Chadwick HS: Toxicity and resuscitation in lidocaine- or bupivacaine-infused cats. *ANESTHESIOLOGY* 63:385-390, 1985
5. Kasten GW, Martin ST: Successful cardiovascular resuscitation after massive intravenous bupivacaine overdosage in anesthetized dogs. *Anesth Analg* 64:491-497, 1985
6. Bernards CM, Carpenter RL, Rupp SM, Brown DL, Morse BV, Morell RC, Thompson GE: Effect of midazolam and diazepam on central nervous system and cardiovascular toxicity of bupivacaine in pigs. *ANESTHESIOLOGY* 70:318-323, 1989
7. Feldman HS, Arthur GR, Pitkanen M, Hurley R, Doucette AM, Covino BG: Treatment of acute systemic toxicity after the rapid in-

## AMRINONE AND BUPIVACAINE TOXICITY

travenous injection of ropivacaine and bupivacaine in the conscious dog. *Anesth Analg* 73:373-384, 1991

8. Heavner JE, Mather LE, Pitkänen M, Shi B: Should epinephrine be used to treat local anesthetic-induced cardiotoxicity? (letter). *ANESTHESIOLOGY* 80:1179, 1994

9. Goenen M, Pedemonte O, Baele P, Col J: Amrinone in the management of low cardiac output after open heart surgery. *Am J Cardiol* 56:33B-38B, 1985

10. Lindgren L, Randell T, Suzuki N, Kytä J, Yli-Hankala A, Rosenberg PH: The effect of amrinone on recovery from severe bupivacaine intoxication in pigs. *ANESTHESIOLOGY* 77:309-315, 1992

11. Weiss JL, Frederiksen JW, Weisfeldt ML: Hemodynamic determinants of the time-course of fall in canine left ventricular pressure. *J Clin Invest* 58:751-760, 1976

12. Heavner JE: Cardiac dysrhythmias induced by infusion of local anesthetics into the lateral cerebral ventricle of cats. *Anesth Analg* 65:133-138, 1986

13. Lynch C III: Depression of myocardial contractility in vitro by bupivacaine, etidocaine, and lidocaine. *Anesth Analg* 65:551-559, 1986

14. Eledjam JJ, de La Coussaye JE, Brugada J, Bassoul B, Gagnol JP, Fabregat JR, Massé C, Sassine A: In vitro study on mechanisms of bupivacaine-induced depression of myocardial contractility. *Anesth Analg* 69:732-735, 1989

15. de La Coussaye JE, Massé C, Bassoul BP, Eledjam JJ, Gagnol JP, Sassine A: Bupivacaine-induced slow-inward current inhibition:

A voltage clamp study on frog atrial fibres. *Can J Anaesth* 37:819-822, 1990

16. Skoyles JR, Sherry KM: Pharmacology, mechanisms of action and uses of selective phosphodiesterase inhibitors. *Br J Anaesth* 68:293-302, 1992

17. Butterworth JF IV, Brownlow RC, Leith JP, Prielipp RC, Cole LR: Bupivacaine inhibits cyclic-3',5'-adenosine monophosphate production: A possible contributing factor to cardiovascular toxicity. *ANESTHESIOLOGY* 79:88-95, 1993

18. Haasio J, Pitkänen MT, Kytä J, Rosenberg PH: Treatment of bupivacaine-induced cardiac dysrhythmias in hypoxic hypercarbic pigs with amiodarone or bretylium. *Reg Anesth* 15:174-179, 1990

19. Bernard JM, Wouters PF, Doursout MF, Florence B, Chelly JE, Merin RG: Effects of sevoflurane and isoflurane on cardiac and coronary dynamics in chronically instrumented dogs. *ANESTHESIOLOGY* 72:659-662, 1990

20. Avery P, Redon D, Schaenzer G, Rusy B: The influence of serum potassium on the cerebral and cardiac toxicity of bupivacaine and lidocaine. *ANESTHESIOLOGY* 61:134-138, 1984

21. Solomon D, Bunegin L, Albin M: The effect of magnesium sulfate administration on cerebral and cardiac toxicity of bupivacaine in dogs. *ANESTHESIOLOGY* 72:341-346, 1990

22. Rosen MA, Thigpen JW, Shnider SM, Foutz SE, Levinson G, Koike M: Bupivacaine-induced cardiotoxicity in hypoxic and acidotic sheep. *Anesth Analg* 64:1089-1096, 1985
